# Supplementary material for: Microfluidic probing of the complex interfacial rheology of multilayer capsules
Source: Royal Society of Chemistry journal article supplement (doi:10.1039/c8sm02507j), 2019-01-01
Supplement: c8sm02507j1.pdf [file c8sm02507j1.pdf]

# Microfluidic probing of the complex interfacial rheology of multilayer capsules.

Corentin Trégouët, Thomas Salez, Cécile Monteux and Mathilde Reyssat

## Supplementary information

---

The objective of this note is to show that  $E_\gamma = \Pi$  ( $E_\gamma$  and  $\Pi$  being respectively the surface dilational elastic modulus and the surface pressure) in the case where the polymer chains remain adsorbed at an interface during a compression event (no chain desorption).

In the case of an interface covered by some polymer chains, the surface tension  $\gamma$  is reduced compared to the bare interface of surface tension  $\gamma_0$  as follows:

$$\gamma = \gamma_0 - \alpha N k_B T \Gamma \quad (1)$$

with  $k_B$  and  $T$  the Boltzmann constant and temperature,  $\alpha$  and  $N$  the grafting degree and the length of the grafts, and  $\Gamma$  the surface concentration of polymers (number of chain per unit area).

The surface pressure defined as  $\Pi = \gamma_0 - \gamma$  reads:

$$\Pi = \alpha N k_B T \Gamma . \quad (2)$$

Writing  $\Pi_i$  and  $n_i$  the initial surface pressure and initial number polymer chains, and  $A$  and  $A_i$  the area and initial area respectively, the previous equation becomes:

$$\Pi = \alpha N k_B T \frac{n_i}{A} , \quad (3)$$

$$\Pi = \Pi_i \cdot \frac{A_i}{A} . \quad (4)$$

Given that the surface dilational elastic modulus  $E_\gamma$  is defined as follows:

$$E_\gamma = - \frac{d\Pi}{d(\ln A)} , \quad (5)$$

the previous equations lead to the following identity:

$$E_\gamma = \Pi. \quad (6)$$
